# Supplementary material for: Patient Perspectives on Enhancing Clinician Communication About Pain in Sickle Cell Disease
Source: Research Square preprint supplement (doi:10.21203/rs.3.rs-7503185/v1), 2025-09-08
Supplement: Supplementary file 1 [file 598fbbc53723f4d1f15339cf.docx]

**Patient Perspectives on Enhancing Clinician Communication
 About Pain in Sickle Cell Disease**

**Supplementary Material**

Supplementary Material 1.Interview guide for individual semi-structured interviews exploring pain communication with people with sickle cell disease.

1. **Introduction**

Thank you for joining me today. My name is <Name> and I am a physician at <Hospital>. I am working with the Sickle Cell Clinic at <Hospital> to improve the care for people with sickle cell disease. In particular, my goal is to improve communication about pain between people with sickle cell disease and their doctors and nurses. Today, I am hoping to ask about your experiences with communicating about your pain. For many people, the experience of pain may impact their lives emotionally, socially, financially, and in other ways. If any of these aspects of your pain experience feel relevant during the interview, I invite you to share them.

1. **Recent pain communication experience**

First, I would like to ask about your most recent experience with pain related to sickle cell disease. I am going to ask you to think about communicating about your pain with doctors and nurses in the hospital.

For the next few questions, please think about the most recent time that you were admitted to the hospital because of pain—in other words, a time when you stayed for at least one night in the hospital, on a medical floor outside of the Emergency Room, infusion center, or clinic. For some people it may be hard to remember details of what happened while you were experiencing severe pain. For the next few questions, let me know what you do remember, but it’s ok if you don’t remember all the details.

1. Tell me about your experience talking with doctors and nurses about your pain during this hospitalization.
   1. Whom did you talk to about your pain? Doctors? Nurses? Others?
   2. What words did you use to talk about your pain? Were there words that you avoided?
   3. What body language did you use to communicate your pain? Were there actions or behaviors that you avoided?
   4. What emotions did you feel when you were communicating about your pain?
   5. How did you tell the doctors and nurses if your pain was getting worse? How did you tell the doctors and nurses if your pain was getting better?
2. How did the nurses and doctors respond when you told them about your pain?
   1. What words did they use? What body language? What actions or behaviors?
   2. How did their responses make you feel?
3. Thinking about this most recent experience, what do you think went well?
   1. What didn’t go well?
   2. What made the communication difficult?
   3. What would have made the conversation easier?
   4. Is there anything that you would say or do differently in the future?
4. How did your prior experiences affect the way you talked with doctors and nurses during this hospitalization?
5. **Caregiver participation in pain communication** *[SKIP THIS SECTION IF NO CAREGIVER IS SELECTED]*

Next I’d like to ask about how your family members, friends, or other people in your life might affect the way you communicate about your pain.

1. When we scheduled this interview, you had chosen [CAREGIVER] as a person who supports you when you are in the hospital with pain. Could you tell me about your relationship with [CAREGIVER]?
   1. Probe: What do you appreciate about how [CAREGIVER] supports you? What would you change about the way [CAREGIVER] supports you?
2. How does [CAREGIVER] participate in communicating with the doctors and nurses about your pain when you are in the hospital?
   1. What words does [HE/SHE/THEY] use? What body language does [HE/SHE/THEY] use?
   2. How do you feel having [CAREGIVER] with you in the hospital while you are having pain?
   3. How does [CAREGIVER]’s presence affect the conversation with doctors and nurses?
3. How well does [CAREGIVER] understand your pain?
   1. Probe:How similar is the way [CAREGIVER] thinks about your pain to the way you think about your pain?
4. **Learning pain communication strategies**

Now I’d like to ask about your general experiences with talking about pain. I’m going to ask some questions about how you learned how to talk about your pain as you grew up from childhood into adulthood.

1. What experiences from your past have influenced how you talk about pain?
   1. Probe: How did your parents or other caregivers affect how you talk about pain?
   2. Probe: How have other people, including friends, other family members, or people in your community affected how you talk about pain?
2. Has the way you communicate about your pain changed as you’ve gotten older? How so?
3. Are there factors that have influenced how you communicate about pain that we haven’t talked about so far?
4. **Improving pain communication**

Last, I would like to ask your thoughts on how communication between people with sickle cell disease and their doctors and nurses could be improved.

1. Tell me about an experience when communicating about pain with your doctors and nurses went well.
   - 1. What went well about the conversation?
     2. What didn’t go well?
     3. Are there lessons from that experience that you carried forward with you?
2. How would you imagine a successful experience talking with a doctor or nurse about your pain?
   - 1. What people would be involved in the interaction?
        1. Doctors, nurses, other clinicians?
        2. Family member, friend, partner, someone else?
     2. What questions should doctors or nurses ask you in order to understand your pain?
     3. How should a doctor or nurse respond when you tell them about your pain?
        1. What words should they use? What body language?
     4. What would be the most important outcome from the interaction?
        1. For example, improvement in the pain, or feeling heard by the clinician.
3. **Conclusion**

We are nearing the end of our conversation. Thank you so much for sharing your experience with us—your contribution has been so valuable.

1. Before we end, are there any last reflections or thoughts about these topics that you would like to share before we close?
2. I’d like to summarize a few lessons that I’ve learned from you today, and please tell me if I got anything wrong. *[Facilitator summarizes]*

Supplementary Material 2.Template for structured interview summaries prepared during rapid qualitative analysis.

| **Domain/Subdomains** | **Content** |
| --- | --- |
| Experiences communicating with clinicians   - Positive experiences - Negative experiences |  |
| Communication strategies   - Verbal - Nonverbal |  |
| Communication outcomes   - Clinician responses - Clinical outcomes |  |
| Barriers/Facilitators to communication   - Barriers - Facilitators |  |
| Caregiver interactions/impact |  |
| Contributing factors   - Social influences - Sentinel experiences - Changes over time |  |
| Recommendations for improving communication |  |
| Observations/Notes |  |
| Key Quotes |  |

Supplementary Material 3. Consolidated criteria for reporting qualitative studies (COREQ) checklist for reporting qualitative research (Tong et al., 2007).

Developed from:

Tong, A., Sainsbury, P., & Craig, J. (2007). Consolidated criteria for reporting qualitative research (COREQ): A 32-item checklist for interviews and focus groups. *International Journal for Quality in Health Care: Journal of the International Society for Quality in Health Care*, *19*(6), 349–357. https://doi.org/10.1093/intqhc/mzm042

| **Topic** | **Guide Questions/Description** | **Reported on Page #** |
| --- | --- | --- |
| **Domain 1: Research team and reflexivity** | | |
| **Personal characteristics** | | |
| 1. Interviewer/ facilitator | Which author/s conducted the interview or focus group? | 4 |
| 2. Credentials | What were the researcher’s credentials? E.g., PhD, MD | 4 |
| 3. Occupation | What was their occupation at the time of the study? | 4 |
| 4. Gender | Was the researcher male or female? | 4 |
| 5. Experience and training | What experience or training did the researcher have? | 4 |
| **Relationship with participants** | | |
| 6. Relationship established | Was a relationship established prior to study commencement? | 4 |
| 7. Participant knowledge of the interviewer | What did the participants know about the researcher? e.g. personal goals, reasons for doing the research | N/A |
| 8. Interviewer characteristics | What characteristics were reported about the interviewer/facilitator? e.g. bias, assumptions, reasons and interests in the research topic | N/A |
| **Domain 2: Study design** | | |
| **Theoretical framework** | | |
| 9. Methodological orientation and theory | What methodological orientation was stated to underpin the study? e.g. grounded theory, discourse analysis, ethnography, phenomenology, content analysis | 4 |
| **Participant selection** | | |
| 10. Sampling | How were participants selected? e.g., purposive, convenience, consecutive, snowball | 4 |
| 11. Method of approach | How were participants approached? e.g., face-to-face, telephone, mail, email | 4 |
| 12. Sample size | How many participants were in the study? | 4 |
| 13. Non-participation Setting | How many people refused to participate or dropped out? Reasons? | 4 |
| 14. Setting of data collection | Where was the data collected? e.g., home, clinic, workplace | 4 |
| 15. Presence of nonparticipants | Was anyone else present besides the participants and researchers? | N/A |
| 16. Description of sample | What are the important characteristics of the sample? e.g. demographic data, date | 5, 26 |
| **Data collection** | | |  |  |
| 17. Interview guide | Were questions, prompts, and guides provided by the authors? Was it pilot tested? | 4 |
| 18. Repeat interviews | Were repeat interviews carried out? If yes, how many? | N/A |
| 19. Audio/visual recording | Did the research use audio or visual recording to collect the data? | 5 |
| 20. Field notes | Were field notes made during and/or after the interview or focus group? | 4 |
| 21. Duration | What was the duration of the interviews or focus group? | 5 |
| 22. Data saturation | Was data saturation discussed? | 4 |
| 23. Transcripts returned | Were transcripts returned to participants for comment and/or correction? | N/A |
| **Domain 3: Analysis and findings** | | |
| **Data analysis** | | |
| 24. Number of data coders | How many data coders coded the data? | N/A |
| 25. Description of the coding tree | Did the authors provide a description of the coding tree? | N/A |
| 26. Derivation of themes | Were themes identified in advance or derived from the data? | 5 |
| 27. Software | What software, if applicable, was used to manage the data? | N/A |
| 28. Participant checking | Did participants provide feedback on the findings? | 5 |
| **Reporting** | | |
| 29. Quotations presented | Were participant quotations presented to illustrate the themes/findings? Was each quotation identified? e.g., participant number | 6-13, 27-36 |
| 30. Data and findings consistent | Was there consistency between the data presented and the findings? | 6-13, 27-36 |
| 31. Clarity of major themes | Were major themes clearly presented in the findings? | 6-13, 27-36 |
| 32. Clarity of minor themes | Is there a description of diverse cases or a discussion of minor themes? | 6-13, 27-36 |
